# Supplementary material for: Responsiveness to Ipratropium Bromide in Male and Female Patients with Mild to Moderate Chronic Obstructive Pulmonary Disease
Source: PubMed Central journal article supplement — eBioMedicine. 2017 Apr 12;19:139–45. doi: 10.1016/j.ebiom.2017.04.020 (PMC5440622; doi:10.1016/j.ebiom.2017.04.020), 2017-04-12
Supplement: mmc1.pdf [file mmc1.pdf]

**Responsiveness to Ipratropium Bromide in Male and Female Patients with  
Mild to Moderate Chronic Obstructive Pulmonary Disease**

Xuan Li<sup>1</sup>, Ma'en Obeidat<sup>1</sup>, Guohai Zhou<sup>1</sup>, Janice M. Leung<sup>1,2</sup>, Donald Tashkin<sup>3</sup>,  
Robert Wise<sup>4</sup>, John Connett,<sup>5</sup> Philippe Joubert<sup>6</sup>, Yohan Bossé<sup>6,7</sup>, Maarten van den  
Berge<sup>8</sup>, Corry-Anke Brandsma<sup>9</sup>, David Nickle<sup>10</sup>, Ke Hao<sup>11</sup>, Peter D. Paré<sup>1,2</sup>, and  
Don D. Sin<sup>1,2</sup>

Supplementary Files

**Supplement Table 1. The baseline characteristics of study participants of the eQTL dataset according to sex.**

|                                      | <b>Women (n= 441)</b> | <b>Men (n= 523)</b> | <b>p-value</b> |
|--------------------------------------|-----------------------|---------------------|----------------|
| Age (yrs)                            | 59.12±12.13           | 63.35±11.14         | 1.17E-09       |
| Body mass index (kg/m <sup>2</sup> ) | 25.25±5.53            | 26.28±4.67          | 2.33E-05       |
| Smoking (pack-years)                 | 32.87±23.04           | 47.22±29.91         | 7.51E-15       |
| Current smokers                      | 109(24.72%)           | 130(24.86%)         | 1              |
| Former smokers                       | 252(57.14%)           | 339(64.81%)         | 0.02           |
| FEV <sub>1</sub> % of predicted      | 66.66±28.70           | 74.98±23.84         | 8.95 E-03      |

**Supplement Figure 1. Gene expression levels for M3 receptor in lung tissue according to sex**

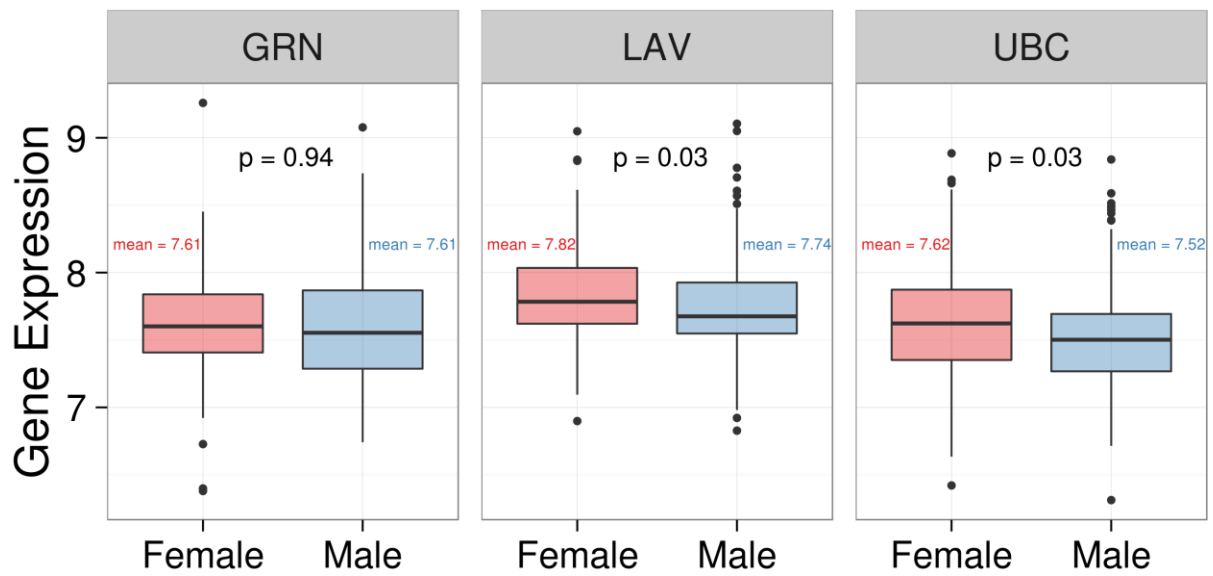

Meta-analysis p-value = 0.0047

Abbreviations: GRN, University of Groningen; LAV, Laval University; UBC, University of British Columbia
